# Supplementary material
Source: MDPI journal article supplement (https://www.mdpi.com/2311-7524/9/7/734)
Supplement: s1 [file s1]

**Table S1.** Primers for Quantitative Real-Time PCR.

| Primer         | Peach Gene ID     | Forward primer (5'-3')   | Reverse primer (5'-3')   |
|----------------|-------------------|--------------------------|--------------------------|
| <i>PpPG</i>    | <i>ppa006857m</i> | ATTGGCATCCCTAAACAG       | CAAGCAACGCCTTCTATC       |
| <i>PpPE</i>    | <i>ppa021753m</i> | ACCCAGATGGATGGACAC       | CGAAGCGAACAGGAACCC       |
| <i>Ppβ-GAL</i> | <i>ppa001412m</i> | ACCAACATTGACAAACTCT      | GGAGCATCATACGACTTG       |
| <i>PpTIR1</i>  | <i>ppa003344m</i> | CTTTGTATAATTGAGCCCCGAAT  | CCAATATACTCAAACGCACGATCA |
| <i>PpIAA1</i>  | <i>ppa011843m</i> | GATCACACAGATGCCCTCC      | GCTCCATCGACGCTTACTTTCA   |
| <i>PpIAA3</i>  | <i>ppa011755m</i> | AGCTGCCAAAAGATGTGACCAA   | CACATAAATCCCACAACCCCTCC  |
| <i>PpIAA5</i>  | <i>ppa011935m</i> | AAAGCGAAACGAAGAACCAAG    | GCTCCATCCATGCTAACCTTGAC  |
| <i>PpIAA9</i>  | <i>ppa006744m</i> | GTATGCCACAATAGCTCGGAA    | GAAGCCCCAAGTCTAAGGTCTGT  |
| <i>PpIAA27</i> | <i>ppa007893m</i> | TCTTCCTCTGCCCTCTCCACA    | AGAGACCCCAATTCCAAGTCC    |
| <i>PpARF2'</i> | <i>ppa022314m</i> | GCTCCGTGTTGGTGTAGAC      | GGCTTGTTCTTGGCTTGTAGTA   |
| <i>PpARF4</i>  | <i>ppa001557m</i> | CGGTGATGTGCTCTAATGCTACT  | GCTACTCTCCTGCGGCTTATG    |
| <i>PpARF5</i>  | <i>ppa000946m</i> | GAAGGGCTGCTAAATGACCCAAGA | ATACAGCGAACACAACCAACGA   |
| <i>PpARF7</i>  | <i>ppa000708m</i> | AATTGAGCCTGTTGTAACCTC    | TGCCAAAGTCATCTCCAAGCCAA  |
| <i>PpARF10</i> | <i>ppa002082m</i> | CCAATCGGACGCTAACAAT      | GTGCCTGAACTTCCATATCTC    |
| <i>PpARF12</i> | <i>ppa002617m</i> | ACCTTTTGTGGCTTCTATACCTG  | ATGGTTTTCACTTCTTTTGCCTT  |
| <i>PpTEF-2</i> | <i>ppa001368m</i> | GTTGCCTTGGTCGGTCTTGA     | ATTGAACAGCAACACGCACAA    |

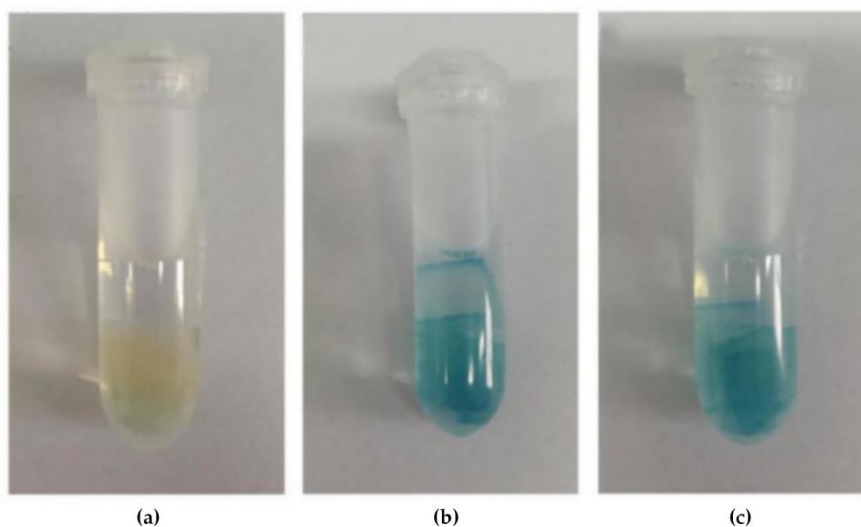

**Figure S1.** GUS staining to verify the success of PpTIR1 overexpression gene in an isolated peach fruit block. (a) Untreated peach fruit block (negative control); (b) peach fruit block of transient transformation in a pCAMBIA3301-121 peach fruit block (positive control); (c) peach fruit block of transient transformation in a pCAMBIA3301-121-PpTIR1 peach fruit block.
